# Supplementary material for: The impact of eliminating within-country inequality in health coverage on maternal and child mortality: a Lives Saved Tool analysis
Source: Springer Nature journal article supplement (doi:10.1186/s12889-017-4737-2), 2017-11-01
Supplement: MOESM1 [file 15205270]

## Additional File 1

### Countries included in analysis

| Country                   | Most recent survey with inequality data | Under-five mortality rate (2016) |
|---------------------------|-----------------------------------------|----------------------------------|
| Afghanistan               | 2010                                    | 91.1                             |
| Albania                   | 2008                                    | 14.0                             |
| Argentina                 | 2011                                    | 12.5                             |
| Armenia                   | 2010                                    | 14.1                             |
| Azerbaijan                | 2006                                    | 31.7                             |
| Bangladesh                | 2011                                    | 37.6                             |
| Barbados                  | 2012                                    | 13.0                             |
| Belarus                   | 2012                                    | 4.6                              |
| Belize                    | 2011                                    | 16.5                             |
| Benin                     | 2011                                    | 99.5                             |
| Bhutan                    | 2010                                    | 32.91                            |
| Bolivia                   | 2008                                    | 38.4                             |
| Bosnia and Herzegovina    | 2011                                    | 5.4                              |
| Brazil                    | 2006                                    | 16.4                             |
| Burkina Faso              | 2010                                    | 88.6                             |
| Burundi                   | 2010                                    | 81.7                             |
| Cambodia                  | 2010                                    | 28.7                             |
| Cameroon                  | 2011                                    | 87.9                             |
| CAR                       | 2010                                    | 130.1                            |
| Chad                      | 2010                                    | 138.7                            |
| Colombia                  | 2010                                    | 15.9                             |
| Comoros                   | 2012                                    | 73.6                             |
| Congo Brazzaville         | 2011                                    | 45.0                             |
| Congo Democratic Republic | 2013                                    | 98.3                             |
| Costa Rica                | 2011                                    | 9.7                              |
| Cote d'Ivoire             | 2011                                    | 92.6                             |
| Dominican Republic        | 2013                                    | 30.9                             |
| Egypt                     | 2008                                    | 24.0                             |
| Ethiopia                  | 2011                                    | 59.2                             |
| Gabon                     | 2012                                    | 50.8                             |
| Gambia                    | 2013                                    | 68.9                             |
| Georgia                   | 2005                                    | 11.9                             |
| Ghana                     | 2011                                    | 61.6                             |
| Guatemala                 | 2008                                    | 29.1                             |
| Guinea                    | 2012                                    | 93.7                             |
| Guinea Bissau             | 2006                                    | 92.5                             |
| Guyana                    | 2009                                    | 39.4                             |
| Haiti                     | 2012                                    | 69.0                             |
| Honduras                  | 2011                                    | 20.4                             |
| India                     | 2005                                    | 47.7                             |
| Indonesia                 | 2012                                    | 27.2                             |
| Iraq                      | 2011                                    | 32.0                             |
| Jamaica                   | 2011                                    | 15.7                             |
| Jordan                    | 2012                                    | 17.9                             |
| Kazakhstan                | 2010                                    | 14.1                             |
| Kenya                     | 2008                                    | 49.4                             |
| Kyrgyzstan                | 2012                                    | 21.3                             |
| Laos                      | 2011                                    | 66.7                             |

|                       |      |       |
|-----------------------|------|-------|
| Lesotho               | 2009 | 90.2  |
| Liberia               | 2013 | 69.9  |
| Macedonia             | 2011 | 5.5   |
| Madagascar            | 2008 | 49.6  |
| Malawi                | 2010 | 64.0  |
| Maldives              | 2009 | 8.6   |
| Mali                  | 2012 | 114.7 |
| Mauritania            | 2011 | 84.7  |
| Moldova               | 2012 | 15.8  |
| Mongolia              | 2010 | 22.4  |
| Morocco               | 2003 | 27.6  |
| Mozambique            | 2011 | 78.5  |
| Namibia               | 2013 | 45.4  |
| Nepal                 | 2011 | 35.8  |
| Nicaragua             | 2001 | 22.1  |
| Niger                 | 2012 | 95.5  |
| Nigeria               | 2013 | 108.8 |
| Palestine             | 2010 | 21.1  |
| Pakistan              | 2012 | 81.1  |
| Peru                  | 2012 | 16.9  |
| Philippines           | 2013 | 28.0  |
| Rwanda                | 2010 | 41.7  |
| Sao Tome and Principe | 2008 | 47.3  |
| Senegal               | 2014 | 47.2  |
| Serbia                | 2014 | 6.7   |
| Sierra Leone          | 2013 | 120.4 |
| Somalia               | 2006 | 136.8 |
| South Africa          | 1998 | 40.5  |
| South Sudan           | 2010 | 92.6  |
| St. Lucia             | 2012 | 14.3  |
| Sudan                 | 2010 | 70.1  |
| Suriname              | 2010 | 21.3  |
| Swaziland             | 2010 | 60.7  |
| Syria                 | 2006 | 12.9  |
| Tajikistan            | 2012 | 44.8  |
| Tanzania              | 2010 | 48.7  |
| Thailand              | 2005 | 12.3  |
| Timor Leste           | 2009 | 52.6  |
| Togo                  | 2013 | 78.4  |
| Trinidad and Tobago   | 2006 | 20.4  |
| Tunisia               | 2011 | 14.0  |
| Turkey                | 2003 | 13.5  |
| Uganda                | 2011 | 54.6  |
| Ukraine               | 2012 | 9.0   |
| Uzbekistan            | 2006 | 39.1  |
| Vanuatu               | 2007 | 27.5  |
| Vietnam               | 2010 | 21.7  |
| Yemen                 | 2006 | 41.9  |
| Zambia                | 2007 | 64.0  |
| Zimbabwe              | 2014 | 70.7  |
